# Supplementary material for: Built Environment Features and Cardiometabolic Mortality and Morbidity in Remote Indigenous Communities in the Northern Territory, Australia
Source: MDPI journal article supplement (doi:10.3390/ijerph19159435), 2022-08-01
Supplement: s1 [file s1]

## Supplementary Materials: Built environment features and cardiometabolic mortality and morbidity in remote Indigenous communities in the Northern Territory, Australia

**Authors:** Amal Chakraborty\*, Margaret Cargo, Victor Maduabuchi Oguoma, Neil T. Coffee, Alwin Chong, and Mark Daniel

**Table S1.** EnRICH health outcomes documentation.

| Definition of health outcome measures                                                                                                                                                                                                                                                                                                                                                                                                                                                                                                                                                                                                                                                                                                                                                                                                                                                                                                                                                                                                                                                                                                                                                                                                                                                                                                                                                                                                                                                                                                             |
|---------------------------------------------------------------------------------------------------------------------------------------------------------------------------------------------------------------------------------------------------------------------------------------------------------------------------------------------------------------------------------------------------------------------------------------------------------------------------------------------------------------------------------------------------------------------------------------------------------------------------------------------------------------------------------------------------------------------------------------------------------------------------------------------------------------------------------------------------------------------------------------------------------------------------------------------------------------------------------------------------------------------------------------------------------------------------------------------------------------------------------------------------------------------------------------------------------------------------------------------------------------------------------------------------------------------------------------------------------------------------------------------------------------------------------------------------------------------------------------------------------------------------------------------------|
| <p>A. Individual de-identified comprehensive cardiometabolic disease and risk profile data from the Northern Territory (NT) Department of Health for the period 1 January 2010 to 31 December 2015, including:</p> <ol style="list-style-type: none"> <li>1) Inpatient Activity (diagnosis and procedures at a hospital)</li> <li>2) Emergency Department Data Collection (presentation at a hospital emergency department)</li> <li>3) Primary Health Care Collection (diagnosis/clinical assessment at primary health care centre)</li> </ol> <p>B. De-identified mortality data from the Births, Deaths, and Marriages Office (NT Department of the Attorney-General and Justice) for the period 1 January 2010 to 31 December 2015.</p> <ol style="list-style-type: none"> <li>1) all-cause mortality, and</li> <li>2) and cardiovascular-specific</li> </ol>                                                                                                                                                                                                                                                                                                                                                                                                                                                                                                                                                                                                                                                                                 |
| <p>For <b>A1 Inpatient Activity</b> (<i>diagnosis and procedures at a hospital</i>), and <b>A2 Emergency Department Data Collection</b> (<i>presentation at a hospital emergency department</i>):</p> <p>Study population = all patients with ICD-10 diagnosis codes</p> <p>E11 Type 2 diabetes mellitus</p> <p>E16 Other disorders of pancreatic internal secretion</p> <p>E66 Obesity</p> <p>E78 Disorders of lipoprotein metabolism and other lipidaemias E88 Other metabolic disorders</p> <p>I10 Essential (primary) hypertension</p> <p>I11 Hypertensive heart disease</p> <p>I12 Hypertensive renal disease</p> <p>I13 Hypertensive heart and renal disease</p> <p>I15 Secondary hypertension</p> <p>I20 Angina pectoris</p> <p>I21 Acute myocardial infarction</p> <p>I22 Subsequent myocardial infarction</p> <p>I23 Certain current complications following acute myocardial infarction</p> <p>I24 Other acute ischaemic heart diseases</p> <p>I25 Chronic ischaemic heart disease</p> <p>I26 Pulmonary embolism</p> <p>I27 Other pulmonary heart diseases</p> <p>I28 Other diseases of pulmonary vessels</p> <p>I60 Subarachnoid haemorrhage</p> <p>I61 Intracerebral haemorrhage</p> <p>I62 Other nontraumatic intracranial haemorrhage</p> <p>I63 Cerebral infarction</p> <p>I64 Stroke, not specified as haemorrhage or infarction</p> <p>I65 Occlusion and stenosis of precerebral arteries, not resulting in cerebral infarction</p> <p>I66 Occlusion and stenosis of cerebral arteries, not resulting in cerebral infarction</p> |

| Definition of health outcome measures                                                                                                                                                                                                                                                                                                                                                                                                                                                                                                                                                                                                                                                                                                                                                                                                                                                                                                                                                                                                                                                                                                                                                                                                                                                                                                                               |
|---------------------------------------------------------------------------------------------------------------------------------------------------------------------------------------------------------------------------------------------------------------------------------------------------------------------------------------------------------------------------------------------------------------------------------------------------------------------------------------------------------------------------------------------------------------------------------------------------------------------------------------------------------------------------------------------------------------------------------------------------------------------------------------------------------------------------------------------------------------------------------------------------------------------------------------------------------------------------------------------------------------------------------------------------------------------------------------------------------------------------------------------------------------------------------------------------------------------------------------------------------------------------------------------------------------------------------------------------------------------|
| <p>I67 Other cerebrovascular diseases</p> <p>I68 Cerebrovascular disorders in diseases classified elsewhere</p> <p>I69 Sequelae of cerebrovascular disease</p> <p>I70 Atherosclerosis</p> <p>I71 Aortic aneurysm and dissection</p> <p>I72 Other aneurysm and dissection</p> <p>I74 Arterial embolism and thrombosis</p> <p>I77 Other disorders of arteries and arterioles</p> <p>I79 Disorders of arteries, arterioles and capillaries in diseases classified elsewhere</p> <p>N00 Acute nephritic syndrome</p> <p>N01 Rapidly progressive nephritic syndrome</p> <p>N02 Recurrent and persistent haematuria</p> <p>N03 Chronic nephritic syndrome</p> <p>N04 Nephrotic syndrome</p> <p>N17 Acute renal failure</p> <p>N18 Chronic renal failure</p> <p>N19 Unspecified kidney failure</p> <p><b>Inpatient Activity</b> coded for patient unique ID, DOB, gender, Indigenous status, Community name (suburb or locality) as text (usual or most recent residence), discharge date, all discharge diagnoses – ICD-coded, all discharge diagnoses – text, ICD version number.</p> <p><b>Emergency Department Data Collection</b> coded for patient unique ID, DOB, gender, Indigenous status, Community name (suburb or locality) as text (usual or most recent residence), presentation diagnosis date, presentation diagnosis – ICD-coded, ICD version number.</p> |
| <p>For <b>A3 Primary Health Care Collection</b> (<i>diagnosis/clinical assessment at primary health care centre</i>)</p> <p>Study population = ICPC Diagnosis code relating to cardiometabolic and behavioural risk factors</p> <p>ICPC-2 Rubric including ICPC-2 PLUS codes where indicated (ICPC-2 Rubric label)</p> <p>T89 (Diabetes; insulin-dependent)</p> <p>T90 (Diabetes; non-insulin-dependent)</p> <p>W85 (Gestational diabetes)</p> <p>K85 (Elevated blood pressure (without hypertension))</p> <p>K86 (Hypertension; uncomplicated)</p> <p>K87 including ICPC-2 PLUS codes W81002-W81003 (Hypertension; complicated)</p> <p>K74 (Ischaemic heart disease with angina)</p> <p>K76 (Ischaemic heart disease without angina)</p> <p>A34005 (Test; C reactive protein)</p> <p>D34005 (Test; aspartate aminotransferase)</p> <p>K34003 (Test; cardiac enzymes)</p> <p>K34004 (Test; creatine kinase)</p> <p>T34010 (Test; HbA1c)</p> <p>T34017 (Test; fructosamine)</p> <p>T34022 (Test; HBA1)</p> <p>T34005 (Test; glucose)</p> <p>T34009 (Test; glucose tolerance)</p> <p>T34023 (Test; glucose (fasting/random))</p>                                                                                                                                                                                                                                      |

| Definition of health outcome measures                                                                                                                                                                                                                                                                                                                                                                                                                                                                                                                                                                                                                                                                                                                                                                                                                                                                                                                                                                                                                                                                                                                                                                                                                                                                                                                                                                                                                                                                                                                                                                                                                                                                                                                                                                                                                                                                                              |
|------------------------------------------------------------------------------------------------------------------------------------------------------------------------------------------------------------------------------------------------------------------------------------------------------------------------------------------------------------------------------------------------------------------------------------------------------------------------------------------------------------------------------------------------------------------------------------------------------------------------------------------------------------------------------------------------------------------------------------------------------------------------------------------------------------------------------------------------------------------------------------------------------------------------------------------------------------------------------------------------------------------------------------------------------------------------------------------------------------------------------------------------------------------------------------------------------------------------------------------------------------------------------------------------------------------------------------------------------------------------------------------------------------------------------------------------------------------------------------------------------------------------------------------------------------------------------------------------------------------------------------------------------------------------------------------------------------------------------------------------------------------------------------------------------------------------------------------------------------------------------------------------------------------------------------|
| <p> T34025 (Test; glucose; fasting)<br/> T34026 (Test; glucose; random)<br/> B34026 (Test; fibrinogen)<br/> K86 (Hypertension; uncomplicated)<br/> K87 (Hypertension; complicated)<br/> K74 (Ischaemic heart disease with angina)<br/> K75 (Acute myocardial infarction)<br/> K76 (Ischaemic heart disease without angina)<br/> T93 including ICPC-2 PLUS codes T99075 (Lipid disorder)<br/> T82 (Obesity)<br/> T83 (Overweight)<br/> K84017 (Cardiomyopathy; primary)<br/> K84034 (Cardiomyopathy; secondary)<br/> K84035 (Cardiomyopathy; congestive)<br/> K84036 (Cardiomyopathy; restrictive)<br/> K84037 (Cardiomyopathy; hypertrophic)<br/> K84041 (Cardiomyopathy)<br/> K74 (Ischaemic heart disease with angina)<br/> K75 (Acute myocardial infarction)<br/> K76 (Ischaemic heart disease without angina)<br/> K77 (Heart failure)<br/> K78 (Atrial fibrillation/flutter)<br/> K79 (Paroxysmal tachycardia)<br/> K80 (Cardiac arrhythmia NOS)<br/> K83 (Heart valve disease NOS)<br/> K84 including ICPC-2 PLUS codes K03001 - K99032 (Heart disease, other)<br/> K06 (Prominent; veins)<br/> K22 (Risk factor; cardiovascular disease)<br/> K85 (Elevated blood pressure)<br/> K86 (Hypertension, uncomplicated)<br/> K87 (Hypertension, complicated)<br/> K88 (Postural hypotension)<br/> K92 (Atherosclerosis/peripheral vascular disease)<br/> K93 (Pulmonary embolism)<br/> K94 (Phlebitis/thrombophlebitis)<br/> K89 (Transient cerebral ischaemia)<br/> K90 (Stroke/cerebrovascular accident)<br/> K91 (Cerebrovascular disease)<br/> W85 (Gestational diabetes) </p> <p> <b>Primary Health Care Collection</b> coded for patient unique ID, current age, diagnosis date, Indigenous status, usual clinic name (attributed to suburb/locality and aggregated to form community-level outcomes), suburb/locality associated with clinic, residency status (resident, visitor, or tourist), ICPC Diagnosis code. </p> |

|                                                                                                                                                                                                                                                                                                                                                                                                                                                                                                                            |
|----------------------------------------------------------------------------------------------------------------------------------------------------------------------------------------------------------------------------------------------------------------------------------------------------------------------------------------------------------------------------------------------------------------------------------------------------------------------------------------------------------------------------|
| <b>Definition of health outcome measures</b>                                                                                                                                                                                                                                                                                                                                                                                                                                                                               |
| <b>For B Territory-wide Mortality data</b>                                                                                                                                                                                                                                                                                                                                                                                                                                                                                 |
| <ol style="list-style-type: none"><li>1) all-cause mortality (see: <a href="http://apps.who.int/classifications/icd10/browse/2010/en">http://apps.who.int/classifications/icd10/browse/2010/en</a>)</li><li>2) cardiovascular-specific mortality, including:<ul style="list-style-type: none"><li>• ischaemic heart disease (ICD-10 codes I20–I25)</li><li>• cerebrovascular disease (ICD-10 codes I60–I69), and</li><li>• diseases of the arteries, arterioles and capillaries (ICD-10 codes I70–I78)</li></ul></li></ol> |
